# Supplementary material for: Partitioning the impacts of spatial and climatological rainfall variability in urban drainage modeling
Source: Copernicus journal article supplement (doi:10.5194/hess-21-1559-2017), 2017-03-14
Supplement: Supplementary file 1 [file hess-21-1559-2017-supplement.zip]

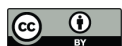

## *Supplement of*

# **Partitioning the impacts of spatial and climatological rainfall variability in urban drainage modeling**

**Nadav Peleg et al.**

*Correspondence to:* Nadav Peleg ([nadav.peleg@sccer-soe.ethz.ch](mailto:nadav.peleg@sccer-soe.ethz.ch))

- [hess-21-1559-2017-supplement-title-page.pdf](#)
- [Supplementary\\_Luzern.pdf](#)

The copyright of individual parts of the supplement might differ from the CC-BY 3.0 licence.
